# Supplementary material for: Syntheses and magnetic properties of high-dimensional cucurbit[6]uril-based metal–organic rotaxane frameworks
Source: Royal Society of Chemistry journal article supplement (doi:10.1039/c9dt01544b), 2019-01-01
Supplement: c9dt01544b1.pdf [file c9dt01544b1.pdf]

**Electronic Supplementary Material (ESI) for Dalton Transactions.**

**This journal is © The Royal Society of Chemistry 2019**

**SUPPLEMENTARY MATERIAL**

**Syntheses and magnetic properties of high dimensional  
cucurbit[6]uril-based metal organic rotaxane frameworks**

Xue-Song Wu,<sup>a</sup> Hong-Fei Bao,<sup>b</sup> Fu-Long Zhu,<sup>b</sup> Jing Sun,<sup>\*a</sup> Xin-Long Wang<sup>a,b</sup> and Zhong-Min Su<sup>\*a,b</sup>

<sup>a</sup> Jilin Provincial Science and Technology Innovation Center of Optical Materials and Chemistry, School of Chemistry and Environmental Engineering, Changchun University of Science and Technology, Changchun, Jilin, 130022, P. R. China.

<sup>b</sup> National & Local United Engineering Laboratory for Power Battery Institution, Northeast Normal University, Changchun, Jilin, 130024, P.R. China.

\*Corresponding Author E-mail: sj-cust@126.com (J. Sun); [zmsu@nenu.edu.cn](mailto:zmsu@nenu.edu.cn) (Z.-M. Su).

## Experimental Section

### Materials and Physical Measurements.

[PR43]<sup>2+</sup>·2[NO<sub>3</sub>]<sup>-</sup> and CB[6] were synthesized according to the references.<sup>1,2</sup> Other purchased chemicals reagents were used without any further purification. The IR spectra were recorded from KBr pellets in the range of 4000-400 cm<sup>-1</sup> on a Mattson Alpha-Centauri spectrometer. Elemental analyses (C, H, and N) were performed on a PerkinElmer 2400 elemental analyzer. Elemental Co contents of compounds **1-3** were determined using an ICP-9000 (N+M) (USA Thermo Jarrell-Ash Corp). Thermogravimetric analysis (TGA) was performed on a PerkinElmer TG-7 analyzer over the temperature 20-800 °C in a nitrogen-gas atmosphere with a heating rate of 10 °C min<sup>-1</sup>. Variable temperature magnetic susceptibility data were obtained in the temperature range of 2-300 K using a SQUID magnetometer (Quantum Design, MPMS-5) with an applied field of 1000 Oe. X-ray photoelectron spectroscopy analyses were performed on a VG ESCALABMKII spectrometer with an Al-K $\alpha$  (1486.6 eV) achromatic X-ray source. Powder X-ray diffraction (XRD) measurements were recorded on a Rigaku Smart Lab with Cu-K $\alpha$  ( $\lambda$  = 1.5418 Å) radiation in the range 5-50°. X-ray diffraction data collection of the compounds was performed using a Bruker Smart Apex II CCD diffractometer with graphite monochromated Mo-K $\alpha$  radiation ( $\lambda$  = 0.71073 Å) at room temperature. All absorption corrections were performed by using the SADABS program. The formulas of compounds **1** and **2** were determined by the combination of elemental analysis, TGA data and the crystallographic data. The water is randomly disordered in compound **3** and the formula of compound **3** was determined by the combination of elemental analysis, TGA data and the SQUEEZE results. The crystallographic data of compound **1-3** have been deposited in the Cambridge Crystallographic Data Center as supplementary publication with CCDC: 1909151, 1909152, 1909153.

### Preparation of [Co<sub>2</sub>(PR43)(BDC)<sub>2</sub>Cl<sub>2</sub>] $\cdot$ 4H<sub>2</sub>O (**1**).

A mixture of  $\text{CoCl}_2 \cdot 6\text{H}_2\text{O}$  (19.0 mg, 0.08 mmol),  $[\text{PR43}]^{2+} \cdot 2[\text{NO}_3]^-$  (55.7 mg, 0.04 mmol),  $\text{H}_2\text{BDC}$  (9.97 mg, 0.06 mmol), 3 drops of triethylamine (where a 1 ml injection syringe is used) and 4 mL of  $\text{H}_2\text{O}$  was stirred for 30 min, and then transferred and sealed in a 18 mL Teflon-lined stainless steel container, which is heated at 140 °C for 72h. Block purple crystals of **1** suitable for X-ray crystallography were obtained, washed with distilled water, and dried in air. Yield: 40.6% based on  $[\text{PR43}]$ . Elemental analysis calc. for  $\text{C}_{68}\text{H}_{76}\text{Co}_2\text{Cl}_2\text{N}_{28}\text{O}_{24}$ . (%): C 43.94, Co 6.34, H 4.12, N 21.10; Found: C 44.76, Co 6.21, H 3.94, N 21.62.

**Preparation of  $[\text{Co}_2(\text{PR43})(\text{BTC})_2] \cdot 6\text{H}_2\text{O}$  (2).**

**2** was synthesized by a procedure similar to that was used for **1** with  $\text{H}_3\text{BTC}$  (10.5 mg, 0.05 mmol) instead of  $\text{H}_2\text{BDC}$ . Yield: 36.4% based on  $[\text{PR43}]$ . Elemental analysis calc. for  $\text{C}_{70}\text{H}_{80}\text{Co}_2\text{N}_{28}\text{O}_{31}$ . (%): C 43.62, Co 6.12, H 4.18, N 20.35; Found: C 44.56, Co 5.98, H 4.06, N 20.54.

**Preparation of  $[\text{Co}_2(\text{PR43})(\text{BPT})_2] \cdot 20\text{H}_2\text{O}$  (3).**

**3** was synthesized by a procedure similar to that was used for **1** with  $\text{H}_3\text{BPT}$  (14.3 mg, 0.05 mmol) instead of  $\text{H}_2\text{BDC}$ . Yield: 43.6% based on  $[\text{PR43}]$ . Elemental analysis calc. for  $\text{C}_{82}\text{H}_{114}\text{Co}_2\text{N}_{28}\text{O}_{44}$ . (%): C 42.57, Co 5.09, H 4.97, N 16.95; Found: C 42.31, Co 5.21, H 5.08, N 16.73.

**Table S1.** Crystallographic data and structure refinements for compounds **1-3**.

|                                                                 | <b>1</b>                                                                              | <b>2</b>                                                              | <b>3</b>                                                               |
|-----------------------------------------------------------------|---------------------------------------------------------------------------------------|-----------------------------------------------------------------------|------------------------------------------------------------------------|
| Empirical formula                                               | [Co <sub>2</sub> (PR43)(BDC) <sub>2</sub> Cl <sub>2</sub> ] $\cdot$ 4H <sub>2</sub> O | [Co <sub>2</sub> (PR43)(BTC) <sub>2</sub> ] $\cdot$ 6H <sub>2</sub> O | [Co <sub>2</sub> (PR43)(BPT) <sub>2</sub> ] $\cdot$ 20H <sub>2</sub> O |
| Mr                                                              | 1858.32                                                                               | 1927.48                                                               | 2313.86                                                                |
| T/K                                                             | 293(2)                                                                                | 293(2)                                                                | 293(2)                                                                 |
| Crystal system                                                  | Monoclinic                                                                            | Orthorhombic                                                          | Monoclinic                                                             |
| Space group                                                     | <i>P2<sub>1</sub>/c</i>                                                               | <i>Pbca</i>                                                           | <i>P2<sub>1</sub>/n</i>                                                |
| <i>a</i> /Å                                                     | 14.256(5)                                                                             | 19.034(5)                                                             | 13.868(5)                                                              |
| <i>b</i> /Å                                                     | 19.149(5)                                                                             | 14.409(5)                                                             | 14.824(5)                                                              |
| <i>c</i> /Å                                                     | 14.830(5)                                                                             | 27.801(5)                                                             | 25.364(5)                                                              |
| $\alpha$ (°)                                                    | 90.000(5)                                                                             | 90                                                                    | 90.000(5)                                                              |
| $\beta$ (°)                                                     | 110.087(5)                                                                            | 90                                                                    | 92.949(5)                                                              |
| $\gamma$ (°)                                                    | 90.000(5)                                                                             | 90                                                                    | 90.000(5)                                                              |
| <i>V</i> /Å <sup>3</sup>                                        | 3802(2)                                                                               | 7625(4)                                                               | 5207(3)                                                                |
| <i>Z</i>                                                        | 2                                                                                     | 4                                                                     | 2                                                                      |
| <i>D<sub>c</sub></i> /mg m <sup>-3</sup>                        | 1.623                                                                                 | 1.679                                                                 | 1.476                                                                  |
| $\mu$ /mm <sup>-1</sup>                                         | 0.607                                                                                 | 0.547                                                                 | 0.423                                                                  |
| measured reflections                                            | 38328                                                                                 | 16951                                                                 | 41404                                                                  |
| Independent reflections                                         | 9304                                                                                  | 6476                                                                  | 9162                                                                   |
| data/restraints/parameters                                      | 9304/24/577                                                                           | 6476/21/595                                                           | 9162/1/613                                                             |
| goodness-of-fit on F <sup>2</sup>                               | 1.043                                                                                 | 1.138                                                                 | 1.086                                                                  |
| <i>R</i> <sub>1</sub> <sup>a</sup> [ <i>I</i> > 2σ( <i>I</i> )] | 0.0406                                                                                | 0.1019                                                                | 0.0521                                                                 |
| <i>wR</i> <sub>2</sub> <sup>b</sup> (all data)                  | 0.1137                                                                                | 0.2386                                                                | 0.1716                                                                 |

$$^a R_1 = \sum(|F_o| - |F_c|) / \sum|F_o|, \quad ^b wR_2 = [\sum w(|F_o|^2 - |F_c|^2)^2 / \sum w(F_o^2)]^{1/2}.$$

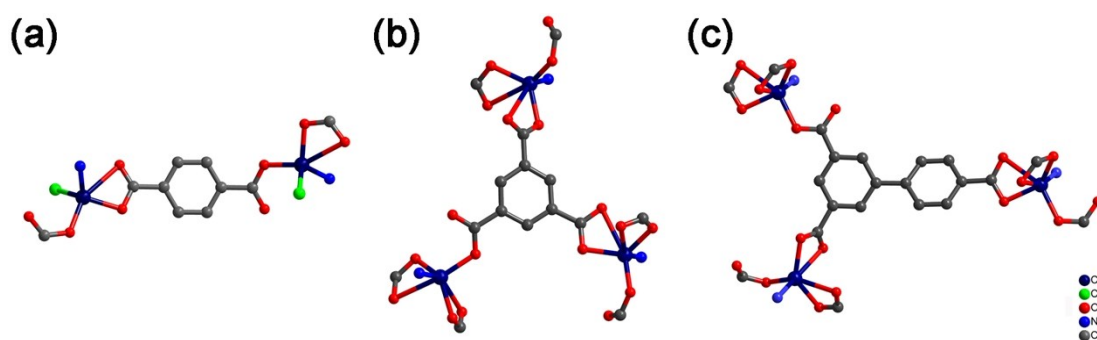

**Fig. S1** The coordination environment of H<sub>2</sub>BDC, H<sub>3</sub>BTC and H<sub>3</sub>BPT.

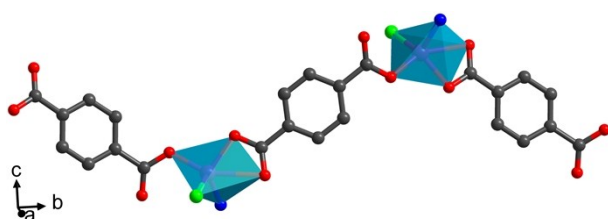

**Fig. S2** The chemical views of the one dimensional chain in **1**.

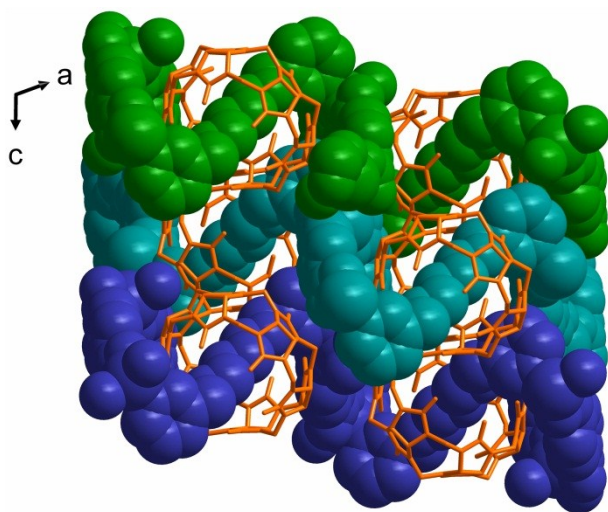

**Fig. S3** The 3D supramolecular architectures as viewed along the *b* axis in **1**.

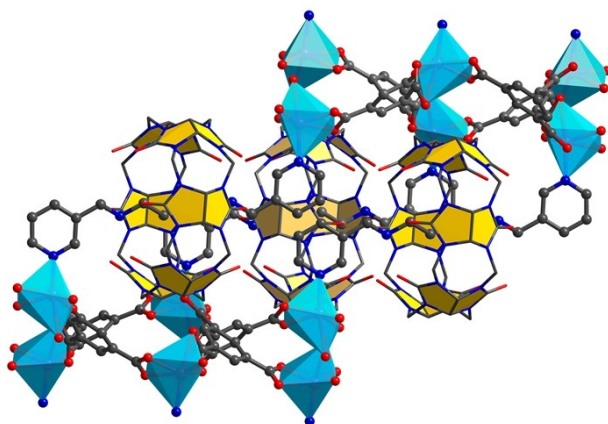

**Fig. S4** The 3D frameworks as viewed along the *a* axis in **2**. Hydrogen atoms are omitted.

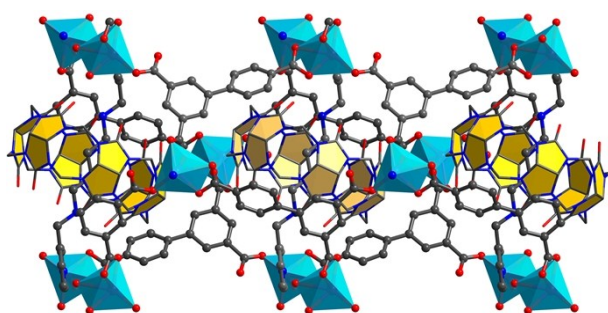

**Fig. S5** The 3D frameworks as viewed along the *c* axis in **3**. Hydrogen atoms are omitted.

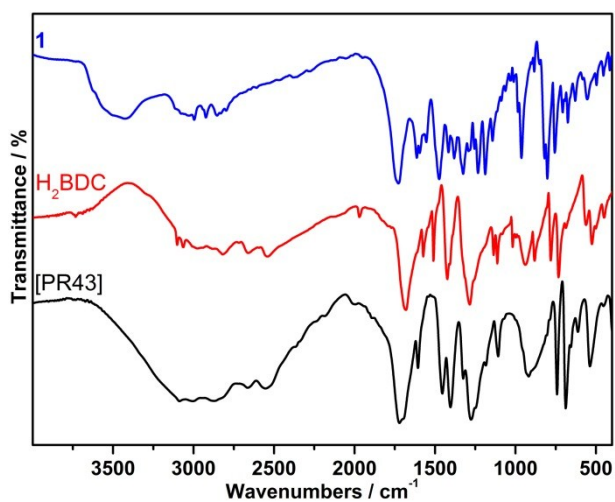

**Fig. S6** The IR spectrum of compound **1**, H<sub>2</sub>BDC and [PR43]<sup>2+</sup>·2[NO<sub>3</sub>]<sup>-</sup>.

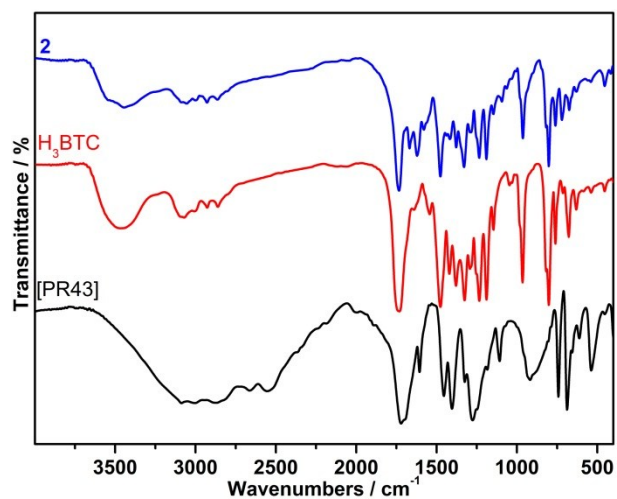

**Fig. S7** The IR spectrum of compound **2**, H<sub>3</sub>BTC and [PR43]<sup>2+</sup>·2[NO<sub>3</sub>]<sup>-</sup>.

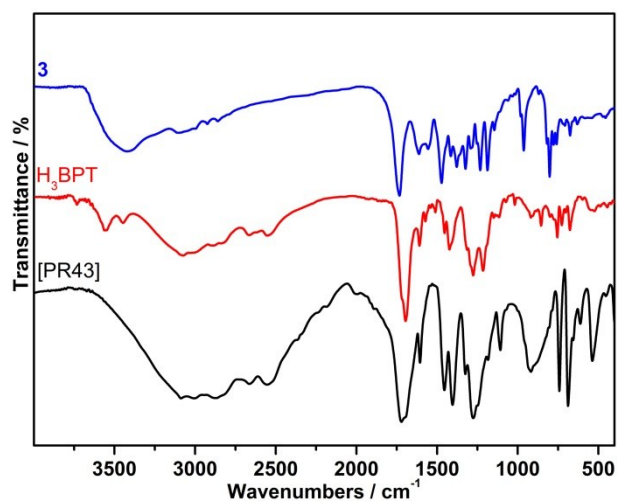

**Fig. S8** The IR spectrum of compound **3**, H<sub>3</sub>BPT and [PR43]<sup>2+</sup>·2[NO<sub>3</sub>]<sup>-</sup>.

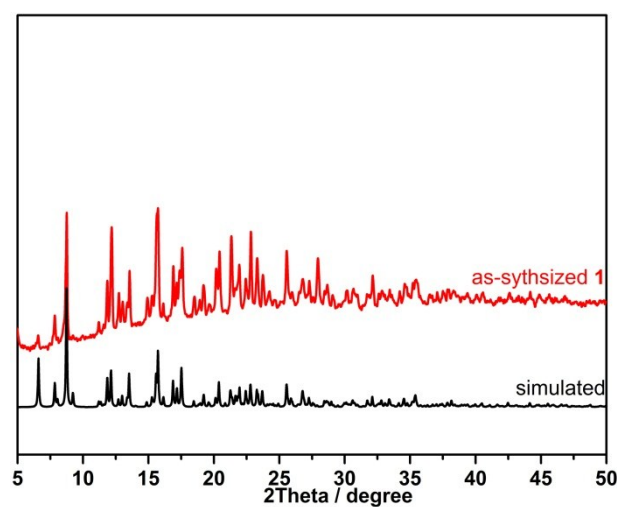

**Fig. S9** PXRD patterns for compound **1** and simulated spectra of compound **1** from single crystal data.

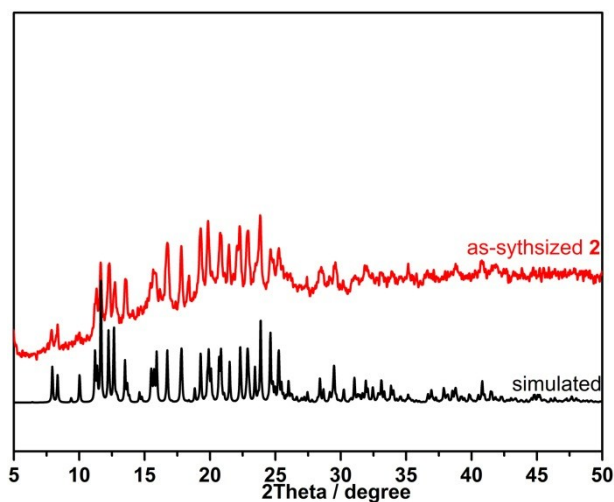

**Fig. S10** PXRD patterns for compound **2** and simulated spectra of compound **2** from single crystal data.

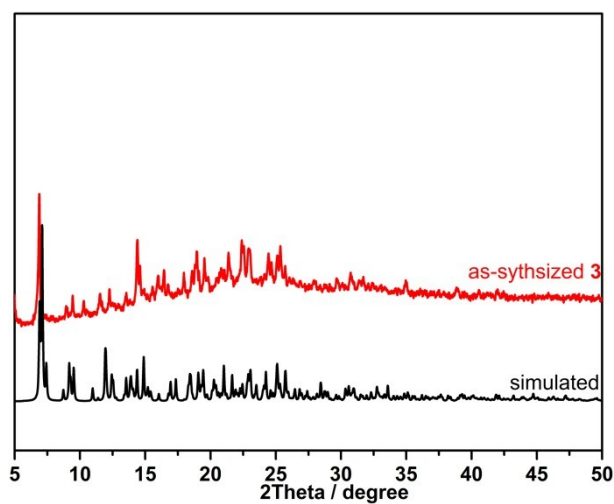

**Fig. S11** PXRD patterns for compound **3** and simulated spectra of compound **3** from single crystal data.

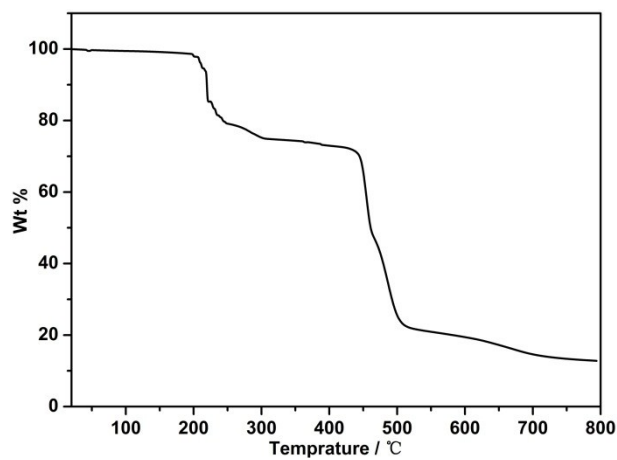

**Fig. S12** Thermal gravimetric analysis (TGA) curves for as-synthesized compound **1**.

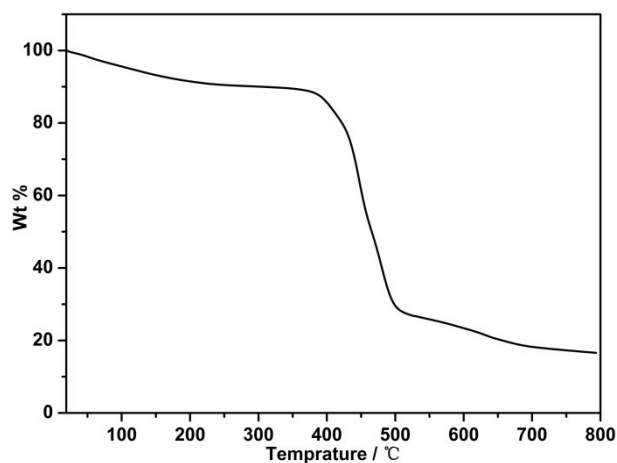

**Fig. S13** Thermal gravimetric analysis (TGA) curves for as-synthesized compound **2**.

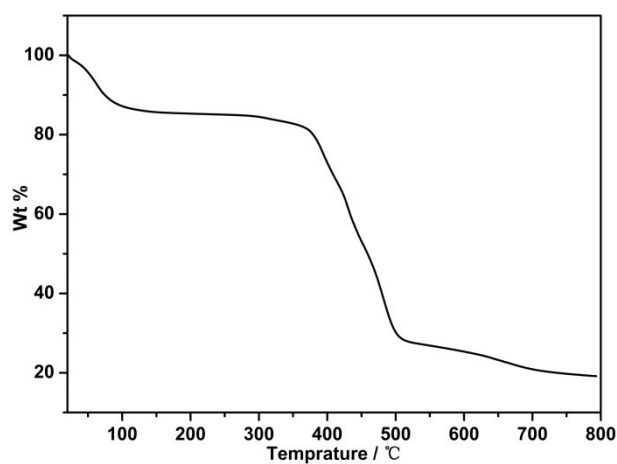

**Fig. S14** Thermal gravimetric analysis (TGA) curves for as-synthesized compound **3**.

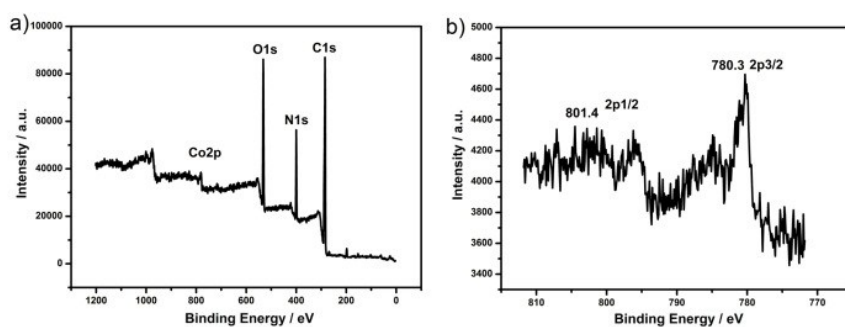

**Fig. S15** XPS spectra of compound **1** give one peak at 780.3 eV, which can be ascribed to  $\text{Co}^{\text{II}} 2p_{3/2}$ .<sup>3</sup>

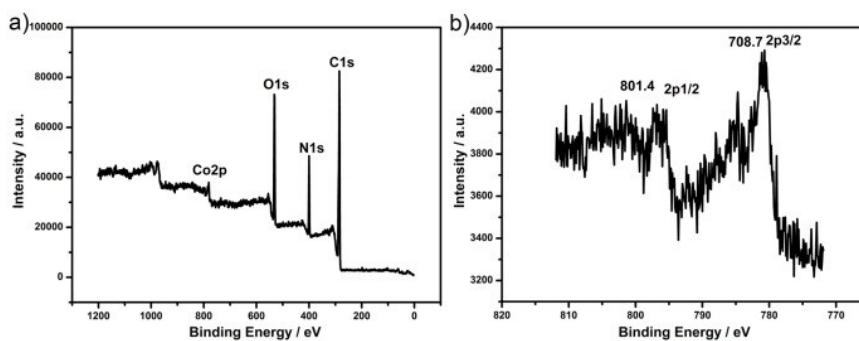

**Fig. S16** XPS spectra of compound **2** give one peak at 780.7 eV, which can be ascribed to  $\text{Co}^{\text{II}} 2p_{3/2}$ .<sup>3</sup>

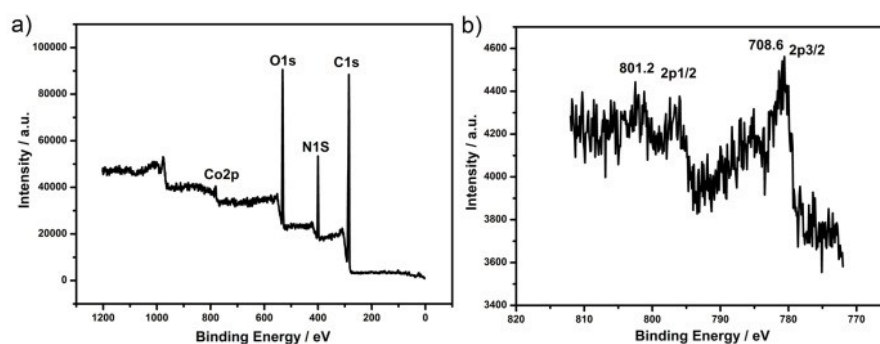

**Fig. S17** XPS spectra of compound **3** give one peak at 780.6 eV, which can be ascribed to  $\text{Co}^{\text{II}} 2p_{3/2}$ .<sup>3</sup>

1 Z.-B. Wang, H.-F. Zhu, M. Zhao, Y.-Z. Li, T.-a. Okamura, W.-Y. Sun, H.-L. Chen and N. Ueyama, *Cryst. Growth Des.*, 2006, **6**, 1420-1427.

2 D. Bardelang, K. A. Udachin, D. M. Leek, J. C. Margeson, G. Chan, C. I. Ratcliffe and J. A. Ripmeester, *Cryst. Growth Des.*, 2011, **11**, 5598-5614.

3 K Yu, B.-B. Zhou, Y. Yu, Z.-H. Su and G.-Y. Yang, *Inorg. Chem.*, 2011, **50**, 1862-1867.
